# Supplementary material for: Response shift results of quantitative research using patient-reported outcome measures: a descriptive systematic review
Source: Springer Nature journal article supplement (doi:10.1007/s11136-023-03495-x), 2023-09-13
Supplement: MOESM1 [file 26040586]

## Response shift synthesis – Supplementary Tables of Unrelated Studies and Independent Samples

Table S1: Prevalence of response-shift results by method, based on unrelated studies and independent samples

|                                     | Study-level results |               | Effect-level results |               |               |               |                                                                      |               |
|-------------------------------------|---------------------|---------------|----------------------|---------------|---------------|---------------|----------------------------------------------------------------------|---------------|
|                                     | Total effects       |               | Total effects        |               | Recalibration |               | Reprioritization and/or Reconceptualization, or Unknown <sup>a</sup> |               |
|                                     | N                   | % RS detected | N                    | % RS detected | N             | % RS detected | N                                                                    | % RS detected |
| <b>Design-based methods:</b>        |                     |               |                      |               |               |               |                                                                      |               |
| Then-test                           | 74                  | 85.1          | 565                  | 48.3          | 565           | 48.3          | 0                                                                    | 0.0           |
| Individualized methods              | 9                   | 100.0         | 19                   | 84.2          | 2             | 100.0         | 17                                                                   | 82.4          |
| Other                               | 11                  | 72.7          | 109                  | 20.2          | 12            | 50.0          | 97                                                                   | 16.5          |
| <b>Latent variable models:</b>      |                     |               |                      |               |               |               |                                                                      |               |
| SEM                                 | 36                  | 83.3          | 2467                 | 8.7           | 812           | 17.5          | 1655                                                                 | 4.4           |
| IRT/Rasch                           | 2                   | 100           | 51                   | 11.8          | 46            | 4.3           | 5                                                                    | 80.0          |
| <b>Regression methods:</b>          |                     |               |                      |               |               |               |                                                                      |               |
| With classification                 | 9                   | 77.8          | 37                   | 78.4          | 8             | 100.0         | 29                                                                   | 72.4          |
| Without classification              | 11                  | 81.8          | 327                  | 14.4          | 5             | 40.0          | 322                                                                  | 14.0          |
| <b>Other study-specific methods</b> | 4                   | 50.0          | 4                    | 50.0          | 0             | 0.0           | 4                                                                    | 50.0          |
| <b>Total</b>                        | <b>134</b>          | <b>84</b>     | <b>3579</b>          | <b>17.0</b>   | <b>1450</b>   | <b>30.0</b>   | <b>2129</b>                                                          | <b>8.2</b>    |

Note. <sup>a</sup>**Unknown** includes several effects for which the pathway was unknown due to it not being explicitly reported. **Unrelated studies** are based on samples that do not overlap with samples from other studies. When studies are related, only the first (original) study is counted. **Independent samples** do not have overlap with other samples within or across studies. When samples are overlapping, only the overall sample is counted (subsamples are not counted). N = the number of studies or response shift effects. For each study, response shift methods were only counted when results about the response shift effects were reported. For studies that reported the same results in multiple manuscripts, only the results of the first published study were counted. % RS detected = the percentage of detected response shift effects of # studies or # response shift effects that were investigated or possible. SEM = Structural Equation Model. IRT/Rasch = Item Response Theory / Rasch Measurement Model. n/a = not applicable.

Table S2: Prevalence and magnitude of effect-sizes by method, based on unrelated studies and independent samples

| RS Metric and Method                         | Study-level results |               | Effect-level results |               |                       |               |                                                                              |     |               |                         |
|----------------------------------------------|---------------------|---------------|----------------------|---------------|-----------------------|---------------|------------------------------------------------------------------------------|-----|---------------|-------------------------|
|                                              | Total effects       |               | Total effects        |               | Recalibration effects |               | Reprioritization and/or Reconceptualization effects, or Unknown <sup>a</sup> |     |               |                         |
|                                              | Prevalence          |               | Prevalence           |               | Prevalence            | Magnitude     | Prevalence                                                                   |     | Magnitude     |                         |
|                                              | N                   | % RS detected | N                    | % RS detected | N                     | % RS detected | ES                                                                           | N   | % RS detected | ES                      |
| <b>Cohen's d<sup>b</sup></b>                 | <b>78</b>           | <b>87.2</b>   | <b>612</b>           | <b>59.0</b>   |                       |               | <b>median (IQR)</b>                                                          |     |               | <b>median (IQR)</b>     |
| Design-based methods: then-test              | 64                  | 85.9          | 500                  | 52.2          | 500                   | 52.2          | 0.21 (0.10-0.39)                                                             | n/a | n/a           | n/a                     |
| Design-based methods: other                  | 3                   | 66.7          | 15                   | 46.7          | 4                     | 50.0          | 0.28 (0.09-0.45)                                                             | 11  | 45.5          | 0.09 (0.05-0.17)        |
| Latent variable models: SEM                  | 14                  | 100.0         | 97                   | 95.9          | 72                    | 100.0         | 0.24 (0.17-0.37)                                                             | 25  | 84.0          | 0.08 (0.01-0.14)        |
| <b>R-squared: median (min-max)</b>           | <b>2</b>            | <b>100.0</b>  | <b>27</b>            | <b>25.9</b>   |                       |               | <b>median (IQR)</b>                                                          |     |               | <b>median (min-max)</b> |
| Regression without classification            | 2                   | 100.0         | 27                   | 25.9          | 0                     | n/a           | n/a                                                                          | 27  | 25.9          | 0.01 (0.00-0.02)        |
| <b>Classification: % respondents with RS</b> | <b>13</b>           | <b>100.0</b>  | <b>15</b>            | <b>100.0</b>  |                       |               | <b>people with RS</b>                                                        |     |               | <b>people with RS</b>   |
| Design-based methods: Individualized         | 6                   | 100.0         | 8                    | 100.0         | 0                     | n/a           | n/a                                                                          | 8   | 100.0         | 72.8                    |
| Design-based methods: Other                  | 1                   | 100.0         | 1                    | 100.0         | 0                     | n/a           | n/a                                                                          | 1   | 100.0         | 48.6                    |
| Regression methods with classification       | 4                   | 100.0         | 4                    | 100.0         | 2                     | 100.0         | n/a                                                                          | 2   | 100.0         | 33.8                    |
| Other study-specific methods                 | 2                   | 100.0         | 2                    | 100.0         | 0                     | n/a           | n/a                                                                          | 2   | 100.0         | 13.3                    |
| <b>Other Effect Size metric</b>              | <b>3</b>            | <b>66.7</b>   | <b>5</b>             | <b>80.0</b>   |                       |               |                                                                              |     |               |                         |
| Design-based methods: Individualized         | 1                   | 100.0         | 1                    | 100.0         | 1                     | 100.0         | n/a                                                                          | 0   | n/a           | n/a                     |
| Latent variable models: SEM                  | 1                   | 100.0         | 3                    | 100.0         | 2                     | 100.0         | n/a                                                                          | 1   | 100.0         | n/a                     |
| Other study-specific methods                 | 1                   | 0.0           | 1                    | 0.0           | 0                     | n/a           | n/a                                                                          | 1   | 0.0           | n/a                     |

Note. Based on a total of 90 unrelated studies and 659 effects from independent samples for which effect sizes could be determined. N = the corresponding # of studies or response shift effects (which are the same for prevalence and magnitudes of the effects). The # of studies (first column) do not add up to 90 or to their respective subtotals (bolded rows) because some studies applied more than one response shift method. % RS detected = the percentage of detected response shift effects of # studies or # response shift effects. % sample = percentage of the pooled sample size (total number of people across studies). SEM = Structural Equation Model. n/a = not applicable because either the response shift pathway could not be investigated due to the method used, or the results could not be discerned from what was reported in the manuscript. IQR = interquartile range. <sup>a)</sup>Unknown includes several effects for which the pathway was unknown due to it not being explicitly reported. <sup>b)</sup>Cohen's d was calculated for 951 of the 1062 effects based on the statistical information reported following the procedures described in Table 1. The remaining 111 effects could not be calculated due to inadequate statistical information, in which case we relied on the Cohen's d effect sizes reported in the manuscript (of these 89 effect sizes were explicitly reported as standardized mean differences and 22 effect sizes were assumed to be standardized mean differences based on overall description of the methods). R-squared median (min-max) = 50<sup>th</sup> percentile, minimum and maximum of the R-squared values.

Table S3: Prevalence and magnitude of response shift results across population characteristics, based on unrelated studies and independent samples

| Population characteristics | Study-level results     |               | Effect-level results    |               |                         |               |                        |                  |                                                                              |               |                        |                  |
|----------------------------|-------------------------|---------------|-------------------------|---------------|-------------------------|---------------|------------------------|------------------|------------------------------------------------------------------------------|---------------|------------------------|------------------|
|                            | Total effects           |               | Total effects           |               |                         |               | Recalibration effects  |                  | Reprioritization and/or Reconceptualization effects, or Unknown <sup>a</sup> |               |                        |                  |
|                            | Prevalence <sup>b</sup> |               | Prevalence <sup>b</sup> |               | Prevalence <sup>b</sup> |               | Magnitude <sup>c</sup> |                  | Prevalence <sup>c</sup>                                                      |               | Magnitude <sup>c</sup> |                  |
|                            | N                       | % RS detected | N                       | % RS detected | N                       | % RS detected | N                      | Median ES (IQR)  | N                                                                            | % RS detected | N                      | Median ES (IQR)  |
| <b>Sex</b>                 |                         |               |                         |               |                         |               |                        |                  |                                                                              |               |                        |                  |
| Mixed                      | 110                     | 82.7          | 3074                    | 14.9          | 1164                    | 26.8          | 101                    | 0.16 (0.09-0.23) | 1910                                                                         | 7.6           | 30                     | 0.09 (0.01-0.17) |
| Only female                | 9                       | 100.0         | 226                     | 36.3          | 161                     | 43.5          | 67                     | 0.29 (0.16-0.49) | 65                                                                           | 18.5          | n/a                    | n/a              |
| Only male                  | 10                      | 80.0          | 161                     | 30.4          | 97                      | 43.3          | 14                     | 0.37 (0.18-0.66) | 64                                                                           | 10.9          | 6                      | 0.12 (0.05-0.25) |
| Other/Unknown              | 5                       | 100.0         | 118                     | 16.9          | 28                      | 39.3          | 576                    | 0.22 (0.11-0.39) | 90                                                                           | 10.0          | n/a                    | n/a              |
| <b>Age</b>                 |                         |               |                         |               |                         |               |                        |                  |                                                                              |               |                        |                  |
| Mostly Adults              | 86                      | 82.6          | 2248                    | 18.5          | 909                     | 29.8          | 105                    | 0.23 (0.09-0.44) | 1339                                                                         | 10.8          | 15                     | 0.14 (0.08-0.25) |
| Mostly Older Adults        | 29                      | 86.2          | 466                     | 22.1          | 214                     | 36.9          | 26                     | 0.02 (0.00-0.12) | 252                                                                          | 9.5           | 16                     | 0.05 (0.02-0.12) |
| Mostly Children/Adolescer  | 8                       | 87.5          | 225                     | 12.0          | 91                      | 29.7          | 58                     | 0.28 (0.20-0.53) | 134                                                                          | 0.0           | n/a                    | n/a              |
| Other/Unknown              | 11                      | 90.9          | 640                     | 9.8           | 236                     | 24.6          | 576                    | 0.22 (0.11-0.39) | 404                                                                          | 1.2           | 5                      | 0.03 (0.01-0.06) |
| <b>Medical condition</b>   |                         |               |                         |               |                         |               |                        |                  |                                                                              |               |                        |                  |
| No                         | 9                       | 88.9          | 117                     | 21.4          | 47                      | 38.3          | 290                    | 0.23 (0.11-0.37) | 70                                                                           | 10.0          | 7                      | 0.05 (0.04-0.09) |
| Yes: Cancer                | 38                      | 92.1          | 1334                    | 17.8          | 637                     | 31.9          | 77                     | 0.43 (0.23-0.82) | 697                                                                          | 5.0           | 12                     | 0.04 (0.01-0.13) |
| Yes: Orthopedic            | 9                       | 77.8          | 78                      | 52.6          | 77                      | 51.9          | 7                      | 0.20 (0.18-0.29) | 1                                                                            | 100.0         | n/a                    | n/a              |
| Yes: Stroke                | 7                       | 85.7          | 292                     | 9.9           | 81                      | 13.6          | n/a                    | n/a              | 211                                                                          | 8.5           | 4                      | 0.08 (0.05-0.12) |
| Yes: Mental Health         | 8                       | 75.0          | 442                     | 6.1           | 149                     | 10.7          | 177                    | 0.18 (0.09-0.31) | 293                                                                          | 3.8           | 0                      | n/a              |
| Yes: Other                 | 63                      | 81.0          | 1316                    | 18.9          | 459                     | 32.0          | 576                    | 0.22 (0.11-0.39) | 857                                                                          | 11.9          | 13                     | 0.17 (0.08-0.25) |
| <b>Intervention</b>        |                         |               |                         |               |                         |               |                        |                  |                                                                              |               |                        |                  |
| No/Unclear                 | 45                      | 80.0          | 1271                    | 12.7          | 394                     | 21.3          | 361                    | 0.26 (0.14-0.44) | 877                                                                          | 8.9           | 13                     | 0.09 (0.05-0.14) |
| Yes: Medical               | 61                      | 86.9          | 1693                    | 20.7%         | 784                     | 35.3%         | 54                     | 0.22 (0.09-0.38) | 909                                                                          | 8.1%          | 15                     | 0.02 (0.00-0.11) |
| Yes: Psychological         | 16                      | 93.8          | 491                     | 10.8%         | 202                     | 19.3%         | 49                     | 0.16 (0.07-0.28) | 289                                                                          | 4.8%          | n/a                    | n/a              |
| Yes: Other/Unspecified     | 12                      | 75.0          | 124                     | 34.7%         | 70                      | 50.0%         | n/a                    | n/a              | 54                                                                           | 14.8%         | 8                      | 0.20 (0.10-0.39) |

Note. <sup>a</sup>**Unknown** includes several effects for which the pathway was unknown due to it not being explicitly reported. <sup>b</sup>**Prevalence** is based on a total of 134 unrelated studies and 3579 effects from independent samples that were investigated or possible. N = # of studies or response shift effects. The # of studies may not add up to 134 (first column) because some studies implemented multiple methods or had multiple independent samples that were counted separately. % RS detected = the percentage of detected response shift effects of # studies conducted or # response shift effects that were investigated or possible. <sup>c</sup>**Magnitude** is based on 78 unrelated studies and 612 effects from independent samples for which Cohen's *d* could be determined. N = the # of these response shift effects. ES = Cohen's *d*. IQR = interquartile range. n/a = not applicable because either the response shift pathway could not be investigated due to the method used or the results could not be discerned from what was reported in the manuscript.

Table S4: Prevalence and magnitude of response shift results for different study design characteristics, based on unrelated studies and independent samples

| Study design characteristics      | Study-level results     |               | Effect-level results |               |                       |               |     |                  |                                                                              |               |     |                  |
|-----------------------------------|-------------------------|---------------|----------------------|---------------|-----------------------|---------------|-----|------------------|------------------------------------------------------------------------------|---------------|-----|------------------|
|                                   | Prevalence <sup>b</sup> |               | Total effects        |               | Recalibration effects |               |     |                  | Reprioritization and/or Reconceptualization effects, or Unknown <sup>a</sup> |               |     |                  |
|                                   | N                       | % RS detected | N                    | % RS detected | N                     | % RS detected | N   | Median ES (IQR)  | N                                                                            | % RS detected | N   | Median ES (IQR)  |
| <b>Design</b>                     |                         |               |                      |               |                       |               |     |                  |                                                                              |               |     |                  |
| Observational                     | 111                     | 86.5          | 2775                 | 17.5          | 1114                  | 31.0          | 441 | 0.20 (0.10-0.38) | 1661                                                                         | 8.4           | 31  | 0.10 (0.04-0.20) |
| Experimental                      | 23                      | 73.9          | 804                  | 15.4          | 336                   | 26.8          | 135 | 0.26 (0.16-0.41) | 468                                                                          | 7.3           | 5   | 0.03 (0.01-0.06) |
| <b>Data analysis</b>              |                         |               |                      |               |                       |               |     |                  |                                                                              |               |     |                  |
| Primary analysis                  | 83                      | 85.5          | 1036                 | 35.0          | 664                   | 46.5          | 489 | 0.22 (0.11-0.39) | 372                                                                          | 14.5          | 15  | 0.14 (0.08-0.25) |
| Secondary analysis                | 50                      | 82.0          | 2533                 | 9.7           | 786                   | 16.0          | 87  | 0.23 (0.12-0.48) | 1747                                                                         | 6.8           | 21  | 0.05 (0.02-0.10) |
| Unknown                           | 1                       | 100.0         | 10                   | 10.0          | n/a                   | n/a           | n/a | n/a              | 10                                                                           | 10.0          | n/a | n/a              |
| <b>Sample sizes (Binned)</b>      |                         |               |                      |               |                       |               |     |                  |                                                                              |               |     |                  |
| Q1 (< 57)                         | 44                      | 77.3          | 913                  | 14.3          | 402                   | 22.9          | 212 | 0.25 (0.12-0.43) | 511                                                                          | 7.6           | 5   | 0.03 (0.01-0.06) |
| Q2 (57 - 254)                     | 61                      | 83.6          | 846                  | 27.0          | 419                   | 39.9          | 210 | 0.25 (0.12-0.46) | 427                                                                          | 14.3          | 11  | 0.14 (0.00-0.22) |
| Q3 (255 - 410)                    | 28                      | 92.9          | 1171                 | 15.1          | 393                   | 32.6          | 121 | 0.16 (0.09-0.25) | 778                                                                          | 6.3           | 8   | 0.10 (0.07-0.35) |
| Q4 (>411)                         | 23                      | 73.9          | 649                  | 11.2          | 236                   | 20.3          | 33  | 0.24 (0.17-0.42) | 413                                                                          | 6.1           | 12  | 0.05 (0.02-0.13) |
| <b>Time period classification</b> |                         |               |                      |               |                       |               |     |                  |                                                                              |               |     |                  |
| < 1 month                         | 12                      | 75.0          | 414                  | 14.0          | 179                   | 25.7          | 69  | 0.25 (0.16-0.35) | 235                                                                          | 5.1           | 7   | 0.01 (0.00-0.03) |
| 1-6 months                        | 21                      | 90.5          | 255                  | 30.2          | 83                    | 51.8          | 44  | 0.41 (0.23-0.78) | 172                                                                          | 19.8          | 11  | 0.05 (0.04-0.10) |
| >6 months - 12 months             | 32                      | 71.9          | 646                  | 12.4          | 257                   | 20.6          | 64  | 0.19 (0.09-0.40) | 389                                                                          | 6.9           | n/a | n/a              |
| > 12 months                       | 76                      | 85.5          | 1825                 | 18.6          | 724                   | 33.8          | 335 | 0.21 (0.10-0.42) | 1101                                                                         | 8.5           | 14  | 0.14 (0.08-0.31) |
| Not reported                      | 12                      | 83.3          | 439                  | 12.5          | 207                   | 23.2          | 64  | 0.16 (0.10-0.24) | 232                                                                          | 3.0           | 4   | 0.18 (0.13-0.24) |

Note. <sup>a</sup>**Unknown** includes several effects for which the pathway was unknown due to it not being explicitly reported. <sup>b</sup>**Prevalence** is based on a total of 134 unrelated studies and 3579 effects from independent samples that were investigated or possible. N = # of studies or response shift effects. The # of studies may not add up to 134 (first column) because some studies implemented multiple methods or had multiple independent samples that were counted separately. % RS detected = the percentage of detected response shift effects of # studies conducted or # response shift effects that were investigated or possible. <sup>c</sup>**Magnitude** is based on 78 unrelated studies and 612 effects from independent samples for which Cohen's *d* could be determined. N = the # of these response shift effects. ES = Cohen's *d*. IQR = interquartile range. n/a = not applicable because either the response shift pathway could not be investigated due to the method used or the results could not be discerned from what was reported in the manuscript.

Table S5: Prevalence and magnitude of response shift results for different PROM categories, based on unrelated studies and independent samples

|                                  | Effect-level results    |               |                         |               |                         |               |                        |                  |                                                                              |               |                        |                  |
|----------------------------------|-------------------------|---------------|-------------------------|---------------|-------------------------|---------------|------------------------|------------------|------------------------------------------------------------------------------|---------------|------------------------|------------------|
|                                  | Study-level results     |               | Total effects           |               | Recalibration effects   |               |                        |                  | Reprioritization and/or Reconceptualization effects, or Unknown <sup>a</sup> |               |                        |                  |
|                                  | Prevalence <sup>a</sup> |               | Prevalence <sup>a</sup> |               | Prevalence <sup>a</sup> |               | Magnitude <sup>b</sup> |                  | Prevalence <sup>a</sup>                                                      |               | Magnitude <sup>b</sup> |                  |
| PROMs                            | N                       | % RS detected | N                       | % RS detected | N                       | % RS detected | N                      | ES (IQR)         | N                                                                            | % RS detected | N                      | ES (IQR)         |
| <b>PROM types</b>                |                         |               |                         |               |                         |               |                        |                  |                                                                              |               |                        |                  |
| <b>Generic PROMs<sup>a</sup></b> | <b>65</b>               | 83.1          | 1598                    | 14.5          | 588                     | 24.5          | 210                    | 0.23 (0.10-0.44) | 1010                                                                         | 8.7           | 16                     | 0.08 (0.01-0.17) |
| #1 SF family <sup>b</sup>        | <b>38</b>               | 86.8          | 1020                    | 16.4          | 336                     | 26.2          | 134                    | 0.29 (0.12-0.51) | 684                                                                          | 11.5          | 16                     | 0.08 (0.01-0.17) |
| #2 EQ 5D <sup>b</sup>            | <b>12</b>               | 75.0          | 40                      | 30.0          | 24                      | 33.3          | 20                     | 0.10 (0.04-0.35) | 16                                                                           | 25.0          | n/a                    | n/a              |
| #3 Other                         | <b>21</b>               | 76.2          | 538                     | 9.9           | 228                     | 21.1          | 56                     | 0.22 (0.06-0.34) | 310                                                                          | 1.6           | n/a                    | n/a              |
| <b>Disease-Specific PROMs</b>    |                         |               |                         |               |                         |               |                        |                  |                                                                              |               |                        |                  |
| #1 EORTC family <sup>b</sup>     | <b>15</b>               | 86.7          | 330                     | 27.0          | 208                     | 37.0          | 119                    | 0.14 (0.08-0.24) | 122                                                                          | 9.8           | 4                      | 0.17 (0.09-0.47) |
| #2 WOMAC                         | <b>4</b>                | 50.0          | 9                       | 55.6          | 9                       | 55.6          | 8                      | 0.20 (0.14-0.29) | n/a                                                                          | n/a           | n/a                    | n/a              |
| #3 Other                         | <b>36</b>               | 75.0          | 691                     | 19.0          | 294                     | 34.4          | 115                    | 0.27 (0.16-0.46) | 397                                                                          | 7.6           | n/a                    | n/a              |
| <b>Individualized PROM</b>       | <b>8</b>                | 100.0         | 25                      | 84.0          | 8                       | 87.5          | 6                      | 0.23 (0.20-0.30) | 17                                                                           | 82.4          | n/a                    | n/a              |
| <b>Other type of PROM</b>        | <b>40</b>               | 70.0          | 926                     | 14.1          | 343                     | 29.4          | 154                    | 0.25 (0.14-0.38) | 583                                                                          | 5.1           | 16                     | 0.07 (0.03-0.14) |
| <b>PROM domains</b>              |                         |               |                         |               |                         |               |                        |                  |                                                                              |               |                        |                  |
| General health/QOL               | <b>84</b>               | 65.5          | 385                     | 26.2          | 178                     | 33.7          | 93                     | 0.24 (0.08-0.42) | 207                                                                          | 19.8          | 2                      | 0.17 (0.14-0.20) |
| Physical                         | <b>85</b>               | 69.4          | 1154                    | 18.5          | 491                     | 32.8          | 235                    | 0.21 (0.12-0.35) | 663                                                                          | 7.8           | 16                     | 0.08 (0.02-0.28) |
| Psychological: depression        | <b>8</b>                | 62.5          | 145                     | 11.7          | 50                      | 32.0          | 4                      | 0.21 (0.16-0.26) | 95                                                                           | 1.1           | n/a                    | n/a              |
| Psychological: other             | <b>76</b>               | 60.5          | 878                     | 13.9          | 334                     | 24.9          | 130                    | 0.19 (0.08-0.31) | 544                                                                          | 7.2           | 12                     | 0.09 (0.03-0.13) |
| Social                           | <b>50</b>               | 60.0          | 470                     | 12.3          | 175                     | 23.4          | 53                     | 0.20 (0.13-0.38) | 295                                                                          | 5.8           | 4                      | 0.08 (0.03-0.18) |
| Pain                             | <b>39</b>               | 66.7          | 193                     | 29.5          | 80                      | 61.3          | 55                     | 0.39 (0.21-0.55) | 113                                                                          | 7.1           | n/a                    | n/a              |
| Other                            | <b>28</b>               | 53.6          | 354                     | 11.6          | 142                     | 17.6          | 42                     | 0.23 (0.10-0.35) | 212                                                                          | 7.5           | 2                      | 0.05 (0.00-0.09) |

Note. <sup>a</sup>**Unknown** includes several effects for which the pathway was unknown due to it not being explicitly reported. <sup>b</sup>**Prevalence** is based on a total of 134 unrelated studies and 3579 effects from independent samples that were investigated or possible. N = # of studies or response shift effects. The # of studies may not add up to 134 (first column) because some studies implemented multiple methods or had multiple independent samples that were counted separately. % RS detected = the percentage of detected response shift effects of # studies conducted or # response shift effects that were investigated or possible. <sup>c</sup>**Magnitude** is based on 76 unrelated studies and 604 effects from independent samples for which Cohen's *d* could be determined. N = the # of these response shift effects. ES = Cohen's *d*. IQR = interquartile range. n/a = not applicable because either the response shift pathway could not be investigated due to the method used or the results could not be discerned from what was reported in the manuscript. SF = Short Form Health Survey, EQ-5D = EuroQol 5 Dimensions, EORTC = European Organisation for Research and Treatment of Cancer. <sup>a</sup>Bolded values indicate pooled results for all generic or disease-specific PROMs. <sup>b</sup>First and second most frequent PROM based on the # of independent studies in which the PROM was used (the # of effects were used when two PROMs are tied based on the # of studies alone).
